# Supplementary material
Source: PubMed Central journal article supplement (PMC3365222)
Supplement: 1119590109_pnas.1119590109_SI.pdf [file 1119590109_pnas.1119590109_SI.pdf]

# Supporting Information

Tang et al. 10.1073/pnas.1119590109

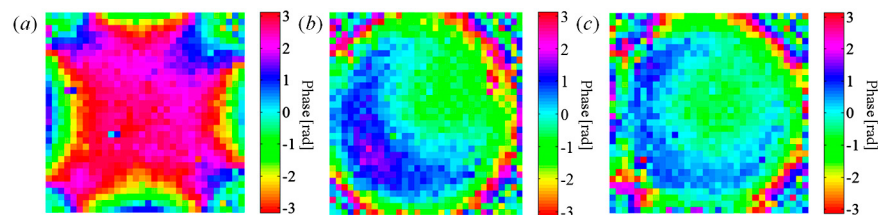

**Fig. S1.** System compensation profile and cover glass induced aberration. (A) System compensation profile. (B) Phase difference between system compensation and Fig. 1F. (C) Phase difference between system compensation and Fig. 1G.

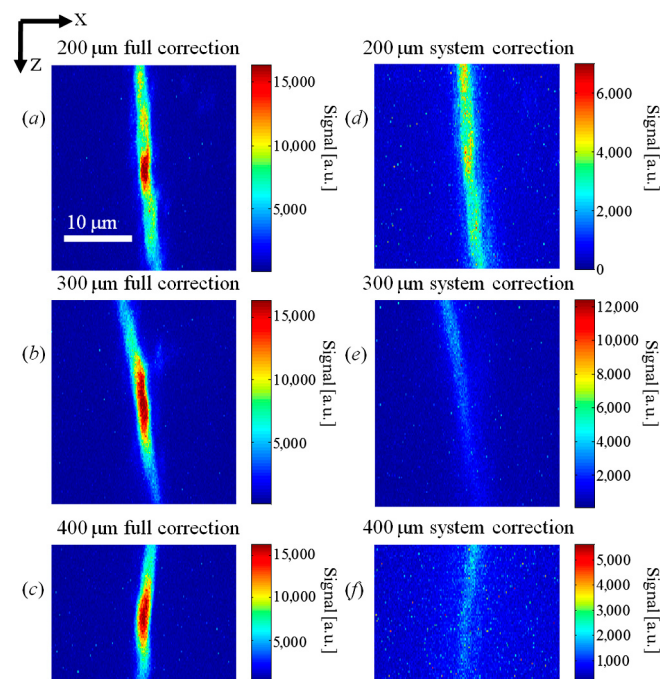

**Fig. S2.** The corresponding side views of Fig. 3 E–J. (A–C) Maximum intensity projection view of the dendrite acquired with full correction at 200, 300, and 400 μm depth, respectively. (D–F) Corresponding views acquired with only system correction.

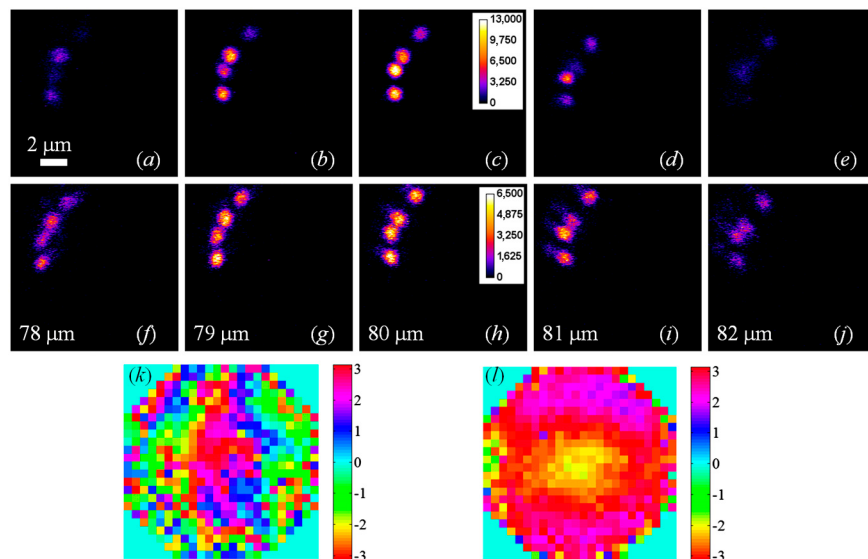

**Fig. S3.** In vivo lymph node imaging at 80  $\mu\text{m}$  depth. (A–E) One micron diameter fluorescence beads imaged with full correction at 78–82  $\mu\text{m}$  depth, respectively. (F–J) The corresponding images acquired with system correction and the same excitation power. (K) Full correction phase profile. (L) System correction phase profile.

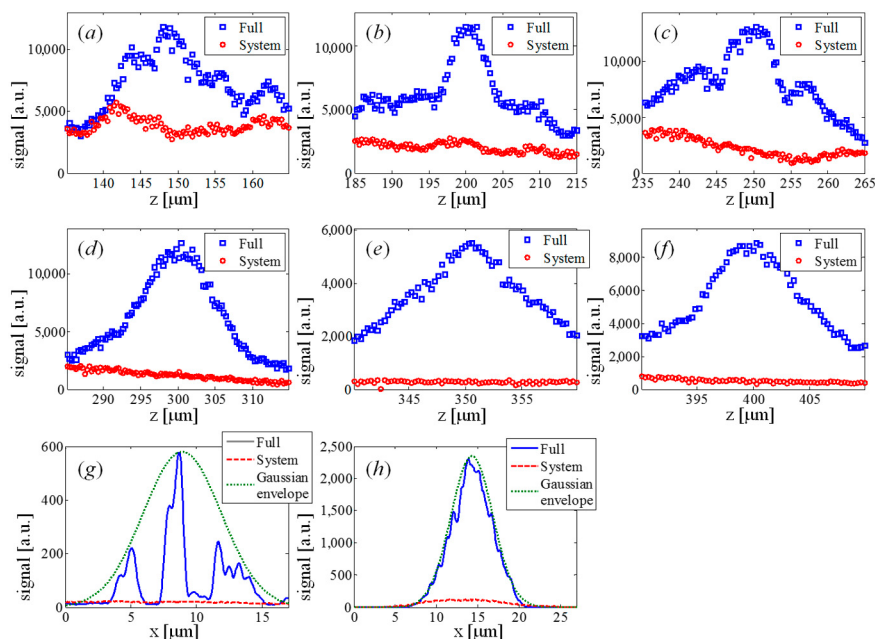

**Fig. S4.** Range of signal improvement with a single IMPACT measurement. (A–F) Comparison of the intensity of the dendrite in Fig. 3A with full correction and system correction from 135 to 410  $\mu\text{m}$ . (G) The image intensity of Fig. 2 B and C averaged along the vertical direction. A Gaussian curve with a FWHM of 7  $\mu\text{m}$  is plotted to show the envelope of the signal improvement. (H) The image intensity of Fig. 2 E and F averaged along the vertical direction. A Gaussian curve with a FWHM of 6  $\mu\text{m}$  is plotted to show the envelope of the signal improvement.



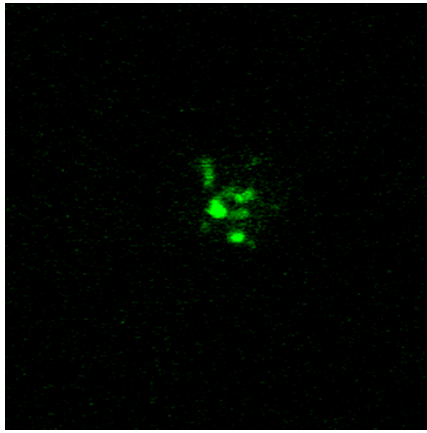

**Movie S1.** The image stack (33 images) used to produce Fig. 4B. The field of view is 27  $\mu\text{m}$ . The axial spacing between the images is 0.4  $\mu\text{m}$ .

[Movie S1 \(MOV\)](#)

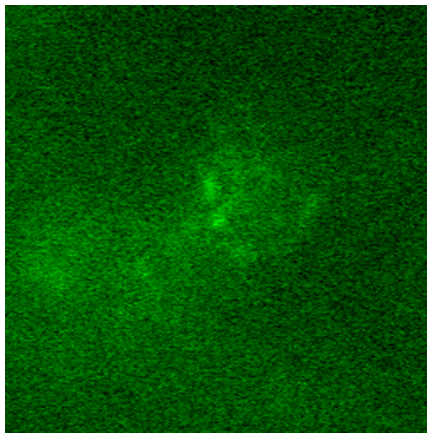

**Movie S2.** The image stack (33 images) used to produce Fig. 4C. The field of view is 27  $\mu\text{m}$ . The axial spacing between the images is 0.4  $\mu\text{m}$ .

[Movie S2 \(MOV\)](#)
